# Supplementary material
Source: PubMed Central journal article supplement (PMC7790103)
Supplement: tpmd200148.SD1.pdf [file tpmd200148.SD1.pdf]

**Supplemental Table S1.** Antimalarial IC<sub>50</sub> values and *pfmdr1* variation in *Plasmodium falciparum* isolates from Colombia

| Study sites                  | Year      | n   | Geometric mean IC <sub>50</sub> in nM (95% CI) |                       |                     |                     |                    | <i>Pfmdr1</i> |                                                                            | Pfk13 | Ref |
|------------------------------|-----------|-----|------------------------------------------------|-----------------------|---------------------|---------------------|--------------------|---------------|----------------------------------------------------------------------------|-------|-----|
|                              |           |     | CQ                                             | AQ                    | MQ                  | LF                  | DHA                | CN            | Alleles                                                                    |       |     |
| Antioquia                    | 2004-2005 | 23  | 491.8<br>(29.8-2429.7)                         | 160.2<br>(8.4-1557.2) | 56.6<br>(2.2-348.6) | -                   | 1.8<br>(0.13-14.0) | -             | 86N 100%<br>1246Y 92%                                                      |       | 13  |
| Chocó                        | 2007      | 17  | 177.4<br>(133.8-235.2)                         | 12.8<br>(10.4-15.7)   | 29.4<br>(23-37.7)   | 2.6<br>(82.3-3.0)   | 1.2<br>(0.9-1.8)   | -             | -                                                                          |       | 14  |
| Nariño                       | 2007      | 17  | 213.5<br>(174.4-261.3)                         | 21.3<br>(17.3-26.3)   | 22.7<br>(17.7-29.2) | 4<br>(1.7-9.0)      | 1<br>(0.8-1.1)     | -             | -                                                                          |       |     |
| Antioquia<br>Chocó<br>Nariño | 2008      | 25  | 422.9<br>(261.9-583.9)                         | 131.4<br>(33.0-229.8) | 56.3<br>(26.8-85.8) | -                   | 1.9<br>(0.58-3.1)  | -             | -                                                                          |       | 15  |
| Nariño                       | 2012-2013 | 68  | 157.77<br>(50-914.84)                          | -                     | -                   | 6.47<br>(2.5-29.38) | 1.32<br>(0.5-7.58) | >1<br>32%     | 86N 100%<br>184F 100%<br>1034S<br>100%<br>1042D 23%<br>1246Y 77%<br>(n=13) | wt    | 10  |
| All                          |           | 150 | 297.9<br>(134.2-661.4)                         | 48.95<br>(6.4-371.8)  | 38.2<br>(18.3-79.8) | 4.1<br>(1.3-12.6)   | 1.4<br>(0.9-1.9)   |               |                                                                            |       |     |

**Supplemental Table S2.** Twelve *Plasmodium falciparum* isolates with complete data for phenotypic and genotypic markers of resistance to artemisinin and other antimalarials

|        | Artemisinin |     | Other antimalarials |                     |      |      |             |        |          |      |          |          |
|--------|-------------|-----|---------------------|---------------------|------|------|-------------|--------|----------|------|----------|----------|
|        | Isolate     | RSA | K13                 | IC <sub>50</sub> nM |      |      |             | Pfmdr1 |          |      |          |          |
| CQ     |             |     |                     | AQ                  | MQ   | LF   | Copy number | 86     | 184      | 1034 | 1042     | 1246     |
| 05051F | 0           | wt  | 161.8               | 42.0                | 23.4 | 9.3  | 1           | N      | <u>F</u> | S    | <u>D</u> | D        |
| 05047F | 0           | wt  | 128.9               | 22.0                | 11.0 | 9.9  | 1           | N      | <u>F</u> | S    | <u>D</u> | <u>Y</u> |
| 03021F | 0           | wt  | 158.2               | 2.5                 | 8.8  | 1.0  | 1           | N      | <u>F</u> | S    | <u>D</u> | D        |
| 05031F | 0           | wt  | 58.9                | 11.3                | 13.2 | 6.0  | 1           | N      | <u>F</u> | S    | <u>D</u> | D        |
| 03043F | 0           | wt  | 140.7               | 72.7                | 53.9 | 6.0  | 1           | N      | <u>F</u> | S    | <u>D</u> | D        |
| 05046F | 0           | wt  | 245.3               | 10.4                | 8.4  | 2.2  | 1           | N      | <u>F</u> | S    | <u>D</u> | D        |
| 03042F | 0           | wt  | 173.0               | 69.1                | 60.2 | 7.4  | 1           | N      | <u>F</u> | S    | <u>D</u> | D        |
| 03044F | 0           | wt  | 63.6                | 18.2                | 31.6 | 2.5  | 1           | N      | <u>F</u> | S    | <u>D</u> | D        |
| 05048F | 0           | wt  | 42.0                | 10.2                | 12.7 | 7.3  | 1           | N      | <u>F</u> | S    | <u>D</u> | D        |
| 05029F | 2.1         | wt  | 172.9               | 22.8                | 33.9 | 54.5 | 1           | N      | <u>F</u> | S    | <u>D</u> | <u>Y</u> |
| 05037F | 4.1         | wt  | 238.6               | 31.4                | 27.8 | 4.6  | 1           | N      | <u>F</u> | S    | <u>D</u> | D        |
| 03022F | 8.3         | wt  | 83.8                | 16.2                | 10.2 | 4.3  | 1           | N      | <u>F</u> | S    | <u>D</u> | D        |

wt, wildtype

**Supplemental Table S3.** Correlations between antimalarial IC<sub>50</sub> values

| <b>Spearman correlation <math>r^2</math> and p values</b> |           |                        |                         |                          |
|-----------------------------------------------------------|-----------|------------------------|-------------------------|--------------------------|
|                                                           | <b>CQ</b> | <b>AQ</b>              | <b>MQ</b>               | <b>LF</b>                |
| <b>CQ</b>                                                 | 1         | 0.41<br>p=0.09<br>n=19 | 0.27<br>p=0.27<br>n=18  | 0.27<br>p=0.26<br>n=20   |
| <b>AQ</b>                                                 |           | 1                      | 0.76<br>p<0.001<br>n=25 | 0.5<br>p=0.01<br>n=24    |
| <b>MQ</b>                                                 |           |                        | 1                       | 0.59<br>p<0.0001<br>n=27 |
| <b>LF</b>                                                 |           |                        |                         | 1                        |

**Supplemental Table S4.** Comparisons of antimalarial IC<sub>50</sub> values according to ring survival rate

| IC <sub>50</sub>   | Geometric mean IC <sub>50</sub> value in nM (95% CI) |                            | Mann<br>Whitney |
|--------------------|------------------------------------------------------|----------------------------|-----------------|
|                    | RSA >1%                                              | RSA ≤1%                    |                 |
| Chloroquine        | 134.6 (61.1-296.3)<br>n=4                            | 104.7 (77.2-142.1)<br>n=17 | NS              |
| Amodiaquine        | 12.2 (2.7-55.2)<br>n=6                               | 16.2 (11.0-23.7)<br>n=26   | NS              |
| Mefloquine         | 12.8 (4.0-40.6)<br>n=5                               | 19.5 (14.4-26.4)<br>n=30   | NS              |
| Lumefantrine       | 3.9 (0.8-19.6)<br>n=6                                | 3.7 (2.7-5.0)<br>n=25      | NS              |
| Dihydroartemisinin | 0.3 (0.1-0.5)<br>n=6                                 | 0.3 (0.2-0.4)<br>n=36      | NS              |

NS, not significant

**Supplemental Table S5.** Comparisons of antimalarial IC<sub>50</sub> values according to *pfmdr1* (86-184-1034-1042-1246) haplotype

| <b>Antimalarial drug</b> | <b>Geometric mean IC<sub>50</sub> in nM<br/>(95% CI)</b> |                               |
|--------------------------|----------------------------------------------------------|-------------------------------|
|                          | <b><u>NFSDD</u></b>                                      | <b><u>NFSDY</u></b>           |
| Chloroquine              | 106.8<br>(76.-148.3)<br>*n=15                            | 128.3<br>(60.8-270.9)<br>*n=3 |
| Amodiaquine              | 14.1<br>(9.0-22.3)<br>*n=23                              | 21.0<br>(4.2-104.1)<br>*n=5   |
| Mefloquine               | 19.0<br>(13.4-27.0)<br>*n=26                             | 23.5<br>(9.8-56.6)<br>*n=5    |
| Lumefantrine             | 3.3<br>(2.3-4.6)<br>*n=21                                | 6.7<br>(1.1-42.2)<br>*n=5     |

\*Number of core assays
